# Supplementary material for: Polyurethane-based nanocomposite film with thermal deicing capability and anti-erosion for wind turbine blades protection in extreme environments
Source: Royal Society of Chemistry journal article supplement (doi:10.1039/d3ta05595g), 2023-01-01
Supplement: d3ta05595g1.pdf [file d3ta05595g1.pdf]

Supplementary information for

# Polyurethane-based nanocomposite film with thermal deicing capability and anti-erosion for wind turbine blades protection at extreme-environment

## 1. Supporting Figures

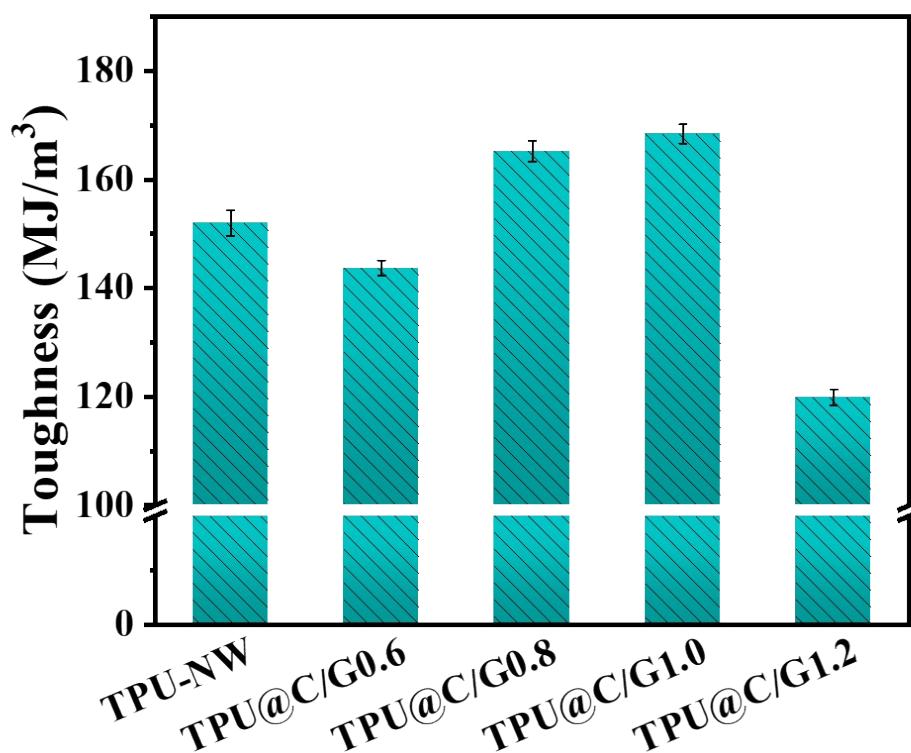

Fig S1. Toughness of as-prepared TPU-NW and its nanocomposite films.

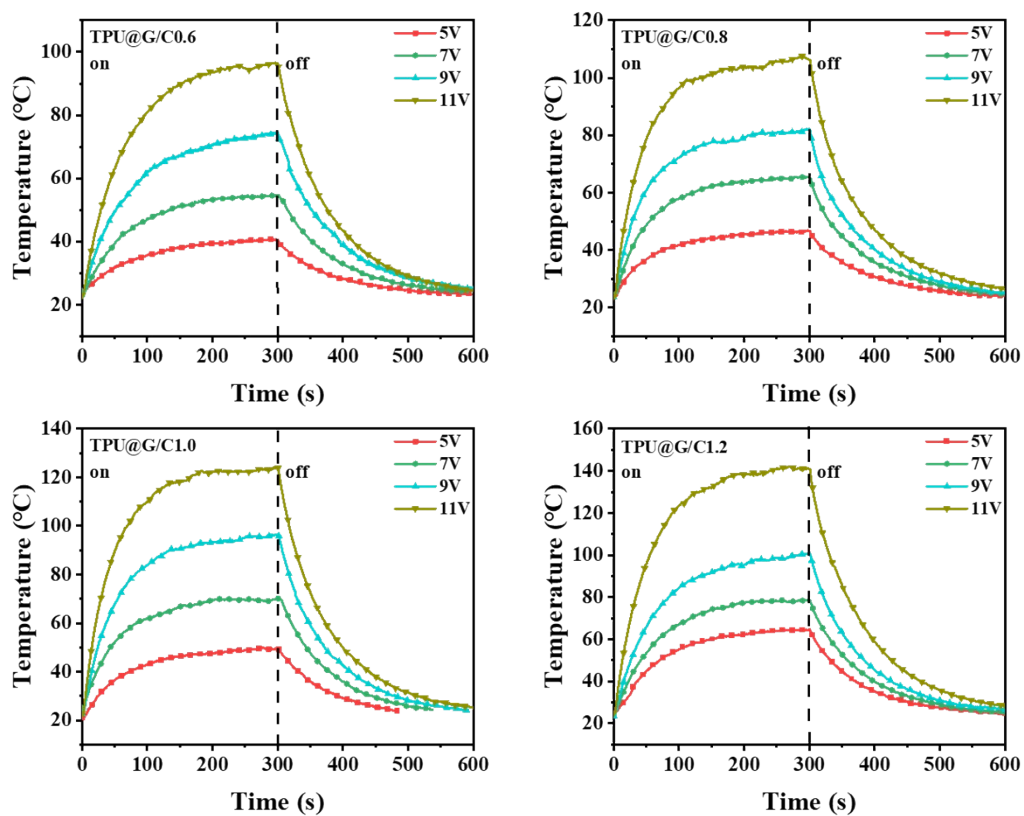

Fig S2. The real-time surface temperature of heaters under different DC voltages.

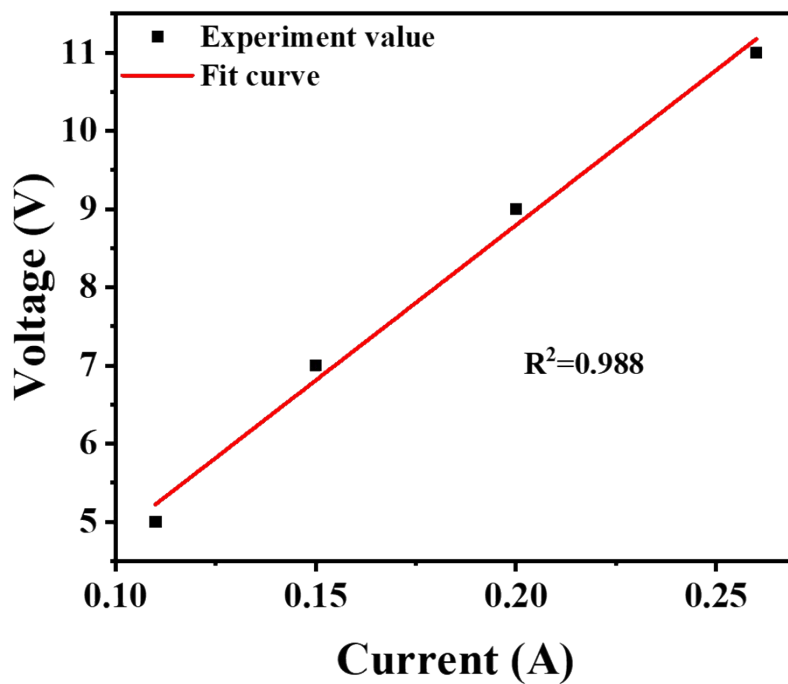

Fig S3. Voltage basically is directly proportional to current for the TPU@G/C1.0. (Joule law)

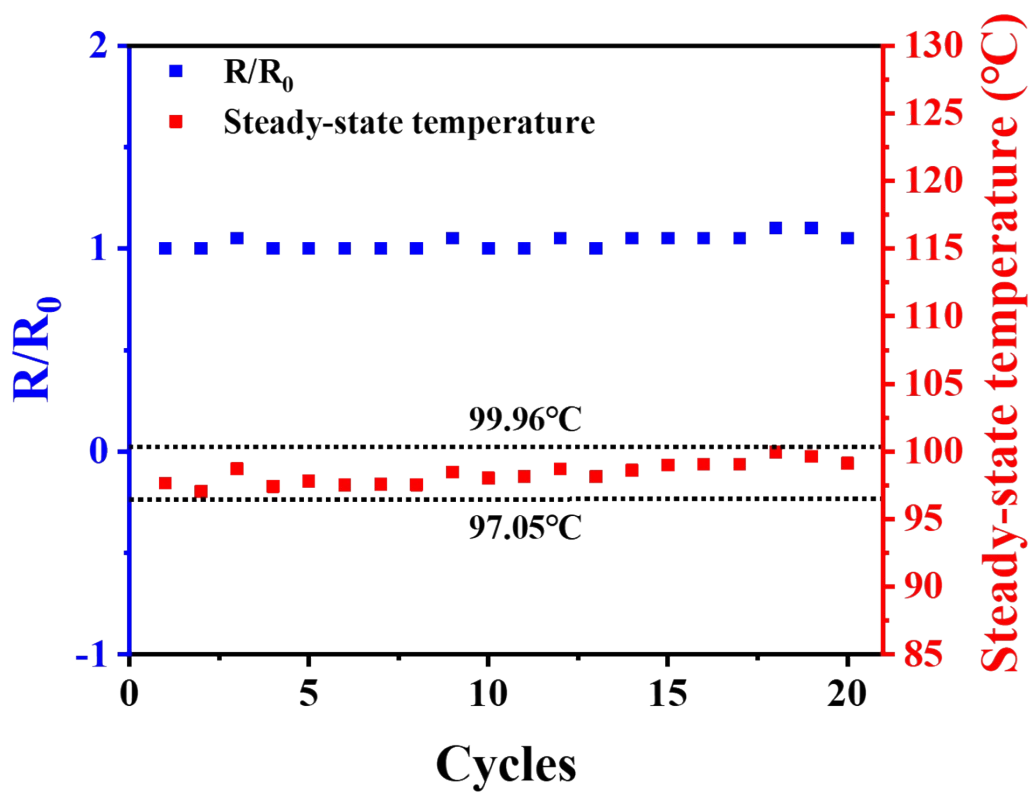

Fig S4. Steady-state temperature and resistance fluctuations of TPU@G/C1.0 during 20 heating and cooling cycles at 9 V. (R<sub>0</sub> is the initial resistance. R is the real-time resistance.)

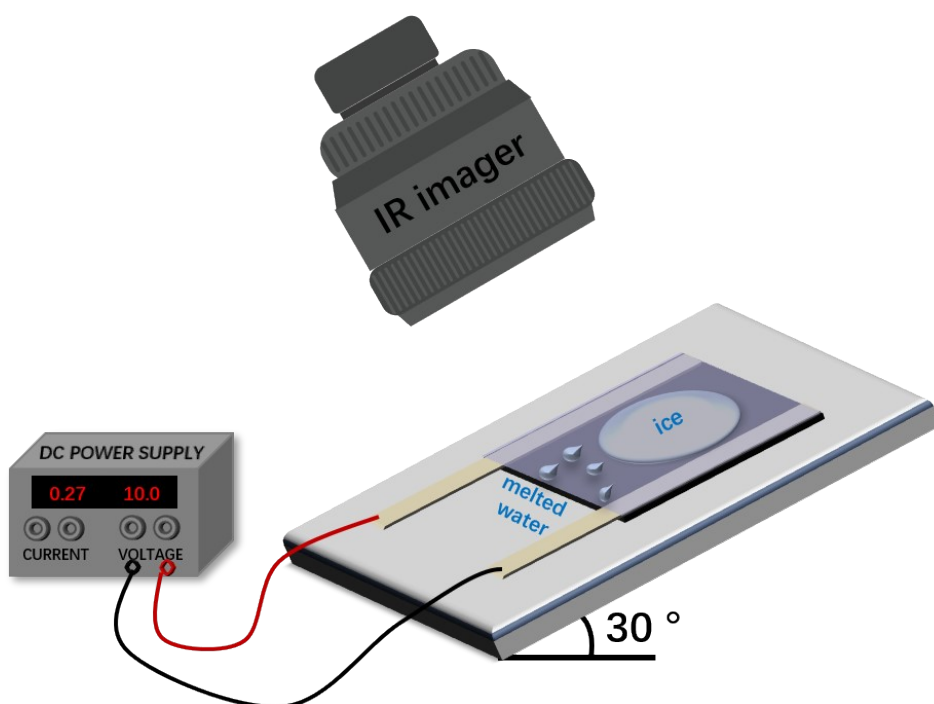

Fig S5. Equipment of the electrothermal deicing test

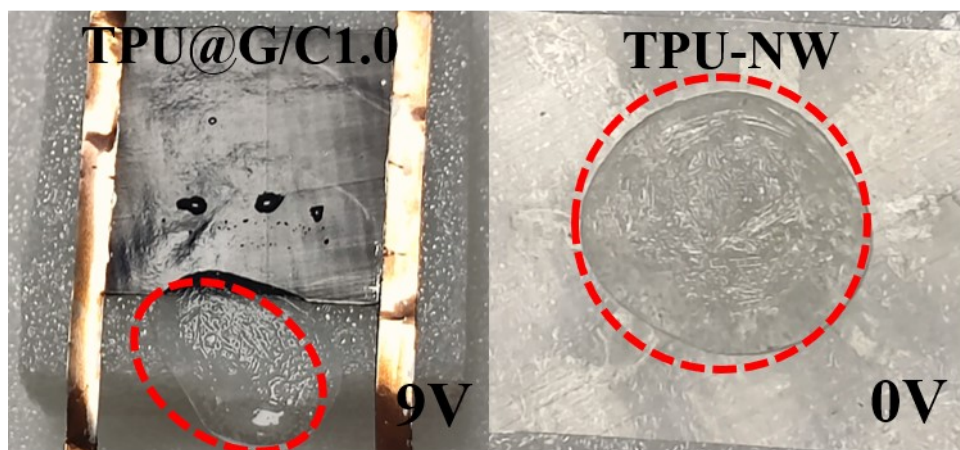

Fig S6. The actual comparison images after 150 s deicing test.

## 2. Supporting Table

Table S1. Content of G/C in nanocomposite films.

| Samples    | content of G/C(wt%) |
|------------|---------------------|
| TPU-NW     | 0                   |
| TPU@C/G0.6 | 1.35                |
| TPU@C/G0.8 | 1.69                |
| TPU@C/G1.0 | 2.02                |
| TPU@C/G1.2 | 2.34                |

Table S2. square resistance (R), conductivity ( $\sigma$ ) and resistivity ( $\rho$ ) of the heaters.

| Sample     | R/ $\Omega$ | $\sigma/S \cdot m^{-1}$ | $\rho/\Omega \cdot cm$ |
|------------|-------------|-------------------------|------------------------|
| TPU-NW     | $\infty$    | 0                       | --                     |
| TPU@G/C0.6 | 62.31       | 161.29                  | 0.62                   |
| TPU@G/C0.8 | 41.40       | 243.90                  | 0.41                   |
| TPU@G/C1.0 | 34.59       | 294.12                  | 0.34                   |
| TPU@G/C1.2 | 32.10       | 312.50                  | 0.32                   |
